# Supplementary material for: Physalin A Inhibits MAPK and NF-κB Signal Transduction Through Integrin αVβ3 and Exerts Chondroprotective Effect
Source: PubMed Central journal article supplement (PMC8678602; doi:10.3389/fphar.2021.761922), 2021-12-01

Relative mRNA expression  
of *Itg*  $\alpha$ V and *Itg*  $\beta$ 3

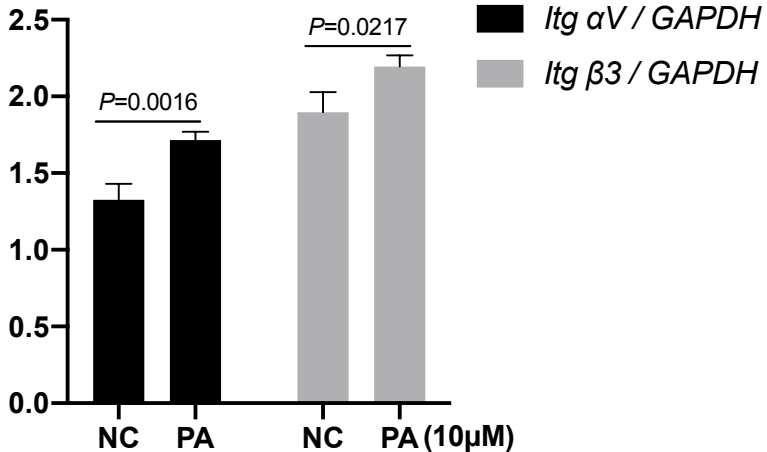

Supplement: Image1.pdf [file Image1.pdf]
